1 **Collation of indigenous and local knowledge as evidence base for herpetofauna conservation outside**  
2 **protected areas: Case study from an agricultural landscape in Eastern India**

3 Deyatima Ghosh<sup>a</sup>, Parthiba Basu<sup>\*a</sup>

4

5

6

7 <sup>a</sup> Department of Zoology, University of Calcutta, 35, Ballygunge Circular Road, Kolkata, 700-019, e-mail:

8 [dgzoors@caluniv.ac.in](mailto:dgzoors@caluniv.ac.in)

9

10 <sup>\*a</sup> Department of Zoology, University of Calcutta, 35, Ballygunge Circular Road, Kolkata, 700-019, e-mail:

11 [bparthib@gmail.com](mailto:bparthib@gmail.com)

12

13 <sup>\*</sup>Corresponding Author: Parthiba Basu

14 Address: Department of Zoology

15 University of Calcutta

16 35, Ballygunge Circular Road

17 Kolkata-700019

18 Email: [bparthib@gmail.com](mailto:bparthib@gmail.com)

19 Key words: Amphibian; Agricultural Intensification Gradient; Community Knowledge; Indigenous Knowledge;

20 Eastern India; Reptile

21

22

23

24

25

26 **Abstract**

27 Systematic appraisal of community's knowledge as evidence for biodiversity conservation has been widely

28 recognized. For conserving the rich biodiversity in the rural landscape outside the protected areas, it is important

29 to document the knowledge and perception of the farming community. Although such appraisal is available for

30 different taxa, no such systematic study is available for herpetofauna- one of the most vulnerable faunal groups.

31 Our study attempts to document the impact of agricultural intensification on herpetofauna in an agricultural  
32 landscape through knowledge and perception appraisal of the farming community. A semi-structured  
33 questionnaire survey and validation was conducted in areas of low, medium, and high agricultural intensification.  
34 In all areas, farmers indicated an overall decrease in herpetofauna abundance. Farmers at the mid and high  
35 agricultural intensification zones reported a more significant decrease in herpetofauna sightings specifically for  
36 amphibians and snakes compared to those under low intensification regions. Farmers at low intensification area  
37 recognized significantly more herpetofauna. Farmers attributed five major threats to herpetofauna and ranked  
38 pesticide as the most significant reason, especially those in higher intensification. The majority were aware of the  
39 importance of herpetofauna as a biological pest control agent. Level of education or farming experience did not  
40 seem to have any influence on the farmers' knowledge. Our findings integrated with other quantitative studies  
41 will facilitate future community-driven conservation in the studied agricultural landscapes.

42

43

#### 44 **Introduction**

45 Importance of systematic appraisal of the local community knowledge about the status or conservation threats to  
46 biodiversity has been widely recognized (Sutherland et al. 2004; Brook and McLachlan 2008; Chowdhury and  
47 Koike 2010; Singh et al. 2013; Braga and Schiavetti 2013; Roue et al. 2017). Use of multiple evidence that  
48 recognizes the community's knowledge in shaping conservation programs has therefore been strongly advocated  
49 (Hunter and Brehm 2003; Sutherland 2013; Segger and Phillips 2015; Dicks et al. 2016; Smith et al. 2017).  
50 Nagoya Protocol (2014) too emphasizes the role of local and indigenous knowledge for conservation and  
51 sustainable use of biodiversity. Notwithstanding the importance of ecological studies in addressing issues  
52 concerning the status and sustainability of biodiversity, community-based information can bring a much-needed  
53 focus in improving our understanding as the strength of such knowledge lie in long exposure to series of local  
54 observations and changes (Folke et al. 2003) that conventional quantitative ecological studies often cannot  
55 capture. Such traditional ecological knowledge is the generation, accumulation, and transmission of information  
56 across generations often resulting in adaptive management of local ecological resources (Berkes Colding and  
57 Folke 2000).

58 Agricultural lands account for a vast expanse of the landscape beyond protected network and harbor rich  
59 biodiversity that is often overlooked. Several studies have taken this approach of appraising from the farming  
60 community about different biodiversity elements and species providing ecosystem services in agriculture (Singh

61 and Sureja 2006; Cesard and Heri 2014; Grzywacz et al. 2014; Smith et al. 2017). However, studies with a similar  
62 approach are non-existent when it comes to farmland amphibians and reptiles or the herpetofauna.  
63 The herpetofauna epitomizes global biodiversity meltdown (Gibbons 2000; Collins and Storfer 2003; Stuart et  
64 al. 2004; Beebee and Griffiths 2005) and is one of the most vulnerable among threatened faunal groups.  
65 Agricultural management leading to habitat loss (Fabricius et al. 2003; Scoccianti 2004; Araujo et al. 2006;  
66 Whitfield et al. 2007) and pesticide usage (Kittusamy et al. 2014; Sparling et al. 2015) is a significant  
67 driver of their decline. They are all the more vulnerable due to their cryptic habit and sensitivity to microhabitat  
68 changes (Valentine et al. 2007). Although recent studies have highlighted their ecological roles in the  
69 agricultural systems- little is known on the subject (Khatiwada et al. 2016; Teng et al. 2016).  
70 Our study attempts to document a range of information from the farming community regarding herpetofauna- 1.  
71 If the farmers notice any change in herpetofauna diversity in their immediate landscape. 2. How familiar are  
72 they with the herpetofauna at locations with different levels of agricultural intensification? 3. What threats do  
73 these local farming communities attribute to any change in herpetofauna diversity and abundance? 4. How do  
74 they value the ecological roles of the herpetofauna?

75

## 76 **Materials and methods**

### 77 **Study site**

78 The study was conducted in Balasore District (21° 29' 41.9208" N, 86° 56' 33.5652" E) Odisha, a state in South-  
79 Eastern India. The average altitude of the district is 19.8m. Balasore District covers an area of 3,634 km<sup>2</sup>. Broadly  
80 the district can be divided into three geographical regions, namely, the coastal belt, the inner alluvial plain, and  
81 the North-Western hills. It is bounded by the Midnapore district of West Bengal in its North, the Bay of Bengal in  
82 the east, Bhadrak district in the South, and Mayurbhanj and Keonjhar districts on its western side. The average  
83 temperature of the district varies from 22°C to 32°C with an annual rainfall of 1583 mm (Balasore official  
84 website).

### 85 **Agricultural Intensification Gradient**

86 Survey was conducted from June 2015 to June 2016 in 20 villages spread across three towns: Nilgiri, Remuna,  
87 and Jaleswar (Fig 1). These three areas respectively represent areas of low, medium, and high agricultural  
88 intensification (Table 1 represents the criteria for classifying the three zones) (Chakrabarti et al. 2015). Study  
89 areas were predominantly under paddy cultivation and the survey program included only farmers.

90

## 91 **Survey**

92 The overall survey followed a methodology modified after Smith et al. (2017). It was a two-step process - the  
93 first phase of individual questionnaire surveys and a second phase of validating the results obtained from the first  
94 phase.

95 First phase included a total of 100 individual farmers taking five farmers randomly from each of 20 villages. The  
96 survey was divided into broad themes -1. Herpetofauna abundance and sighting 2. Familiarity with locally  
97 reported herpetofauna 3. Threats for herpetofauna, 4. The reactions prevalent in the community about them and  
98 5. The awareness within the community about their ecosystem service provisioning. Result from the interviews  
99 was grouped into specific themes and represented here as the per cent response. For recognition or familiarity test  
100 we showed a pictorial checklist of reported local herpetofauna and asked to recognize them. From this we  
101 hypothesized, if at all this recognizing ability varied across the gradient and had high reliability in the data, it  
102 could be a proxy to the difference in diversity across this gradient. Table 2 shows a list of questions used for the  
103 survey. We conducted this phase in isolation to avoid any peer influence and the entire interview was open-ended  
104 to prevent any imposing of opinions from the interviewer and allowing the participants to express their ideas and  
105 attitudes (Uyeda et al. 2014). Verbal consent was obtained from respondents before interviewing them.

106 Results from the first phase were further validated by preparing statements. Table 3 provides a sample of the  
107 statements we prepared. The validation was done in two separate groups in each village. Each validating group  
108 comprised of five new farmers who did not participate in the first questionnaire survey and had no prior knowledge  
109 about the questionnaire. Thus, a total of 40 groups (two groups in each village) making a total of 200 individuals  
110 participated in this second phase. Interviews were conducted by two people (DG and a member of the community)  
111 in local Odia language. A total of 300 farmers participated in this study. During this validation, farmers discussed  
112 each statement that was readout. Each such statement was either accepted, rejected, or modified by the  
113 participating group. This led to a set of finally agreed upon consensus statement.

114 Results from the validation phase were used to testify the findings from the phase I to enhance the quality of data  
115 and make them more conclusive. Gathering community data often suffers from lack of reliability, hence we  
116 assessed the inter-reliability (McHugh 2012) of the data obtained from phase 1 within each village (Fig. 2) and  
117 between the three groups (final checklist from phase 1 based on degree of agreement and from two validation  
118 groups; See Supplementary Information, SII) where ever appropriate.

119

120

121 **Statistical Analysis**

122 **Effect of agricultural intensification on herpetofauna**

123 Farmers in the individual survey were asked if they witnessed any change in herpetofauna sightings in their fields  
124 over the past few years. Chi-square test was performed to check if there existed any difference in the number of  
125 farmers across the gradient who voted for a decrease and whether it varied for any specific herpetofauna groups  
126 i.e. for snakes, lizards, amphibians, or skinks. Marascuilo post hoc test was applied to the significant chi-square  
127 results to know exactly which node of intensification made a significant impact in voting and for which specific  
128 groups.

129

130 **Community Concern for herpetofauna decline**

131 Farmers agreeing to a decrease in herpetofauna were further questioned about the reasons they believed were  
132 responsible for their decline. These questions were open-ended and were non-suggestive. For the drivers voted by  
133 a maximum number of respondents, we checked if there was a difference in the number for that opinion across  
134 the gradient and also used results from the validation groups to get more accurate information.

135 **Inter reliability in data for testing their knowledge**

136 We prepared a colored pictorial checklist of 46 herpetofauna (Table 4) that are reported from Odisha and are also  
137 available in the agricultural landscape consulting available reports (Sanyal 1993; Sarkar 1993; Daniel 2002; Smith  
138 2003; Daniels 2005; Whitaker and Captain 2016). The colored pictorial checklist was shown to the farmers and  
139 was asked to recognize those they have seen in their agricultural lands. Farmers who were in agreement of seeing  
140 particular herpetofauna in their lands were further questioned for their local names.

141 We checked for the inter reliability in data obtained from the five farmers for each village using Cohen's kappa  
142 (Fig. 1) and performed a Kruskal Wallis test followed by Dunn's test to check whether any difference existed in  
143 the herpetofauna recognized across the gradient.

144

145

146 **Level of formal education and farming experience affecting their knowledge**

147 We speculated farmers' recognizing ability could be dependent upon either formal education or on their farming  
148 experience. Hence, we performed two separate Kruskal-Wallis tests to check if farming experience and formal  
149 education varied across the gradient. Subsequently, we applied two Generalized Linear Models to check if farming  
150 experience or qualification had any effect on recognizing ability of the farmers across the gradient.

151

## 152 **Awareness about herpetofaunal role within the community**

153 To assess the state of awareness in the community, farmers were asked whether they believed herpetofauna was  
154 useful and to those who approved of their role in agricultural fields we asked them in what ways did they contribute  
155 to agriculture. Results were pooled together from the farmers across all the three gradients and are represented  
156 graphically in the result section.

157 All statistical analyses were performed using R (version 3.2.3.) packages “Vegan”, “dplyr” maintaining the  
158 assumptions that our data required.

159

## 160 **Result**

### 161 **Status of herpetofauna in agricultural lands**

162 The number of opinions for a decrease in herpetofauna sighting (Fig. 3) was significantly different between the  
163 three zones (Chi-square:  $\chi^2= 33.344$ ,  $df = 2$ ,  $p = .000$ ). Marascuilo test showed (Table 5) there was a significant  
164 difference in the decrease in herpetofauna sightings between low and mid and between low and high  
165 intensification zones but not between mid and high zones.

166

167 Validation results showed the same trend as well, in low intensification zones, only 6 groups out of 18 (33%), in  
168 mid intensification zones 7 out of 10 groups (70%) and 8 out of 12 (66%) groups in high intensification zones  
169 agreed upon a decrease in herpetofauna abundance.

170

### 171 **Which group is more vulnerable?**

172 For individual groups of herpetofauna, significant number of farmers reported a decrease in amphibians ( $\chi^2=$   
173  $33.344$ ,  $df = 2$ ,  $p = 0.001$ ) and snakes ( $\chi^2 = 12.494$ ,  $df = 2$ ,  $p = 0.001$ ) but not for lizards ( $\chi^2= 4.3091$ ,  $df = 2$ ,  $p =$   
174  $0.11$ ) and skinks ( $\chi^2= 5.589$ ,  $df = 2$ ,  $p = 0.06$ ). Support for this view again significantly differed between low and  
175 mid and between low and high intensification zones as observed from Marascuilo test (Table 6 & 7).

176 Thus communities under mid and high agricultural intensification reported a more significant decrease in  
177 herpetofauna sightings specifically for amphibians and snakes compared to those under low intensification  
178 regions.

179

### 180 **Threats to herpetofauna: Concern within the farming community**

181 Analyzing the results from the interviews we grouped the threats attributed by the framers in to 4 major causes  
182 e.g., deforestation, environmental pollution, deliberate killing (conflict), and pesticides application. Results are  
183 represented in figure 4. Of these, pesticide was voted to be most threatening. A similar opinion was expressed by  
184 the validating groups as well, where 36 out of the 40 surveyed groups (90%) stated pesticides to be a major threat.  
185 The number of respondents who addressed pesticide to be a threat was further compared across the gradient, and  
186 maximum farmers (73.33%) in the high intensity and mid-intensity (80%) agricultural zones viewed pesticide as  
187 one of the most crucial cause for the decrease in herpetofauna over years as compared to only 20% votes from  
188 low intensification zones (Fig. 5).

189  
190 82% of all farmers could explain why pesticide is a direct threat for herpetofauna, especially the frogs. They also  
191 mentioned animals dying because of pesticide contamination of the water bodies in agricultural fields. Farmers  
192 were aware of pesticide contamination through the food chain. Quote from a farmer's statement – 'pesticide would  
193 kill the pests, frogs and lizards would feed on them which were in turn fed upon by snakes'. From validation data,  
194 28 groups out of a total of 40 were in agreement with the above statements and 27 groups claimed to know this  
195 from direct field observation. From both the surveys pesticides such as Thimet, Dimecron, Ustad  
196 (Cypermethrine) were designated as most lethal.

#### 197 **Inter-reliability in data for recognizing herpetofauna**

198 We found a high degree of agreement within the data for each village that ranged from 82% to 100%. Table 8  
199 shows the list of Cohen's kappa values for 20 villages. As this analysis shows, for each village, there was high  
200 inter-reliability in the data (above 64% to 100%). The two validation groups for each village (S1 Table provides  
201 the list of Cohen's kappa for all villages) also showed high inter-reliability with the checklist prepared for each  
202 village from phase 1 hence allows for inferential statistical analysis.

203

#### 204 **Knowledge difference across the agricultural intensification gradient**

205 There was a significant knowledge gap among farmers, as the number of recognized herpetofauna varied  
206 significantly between low, mid, and high intensification zones (Kruskal-Wallis chi-squared = 30.129, df = 2,  
207  $p=0.000$ ). Dunn's test showed this difference was significant between low and high ( $p=0.000$ ) and low and mid  
208 ( $p = 0.000$ ). However, there was no significant difference between mid and high intensification zones ( $p = 0.6$ ).

209

#### 210 **Role of formal education and farming experience for recognizing herpetofauna**

211 Formal education (Kruskal-Wallis chi-squared = 5.1108, df = 2, p-value = 0.07766) and farming experience  
212 (Kruskal-Wallis chi-squared = 0.46228, df = 2, p-value = 0.7936) did not vary across the gradient. Number of  
213 herpetofauna recognized was independent of farming experience ( $p = 0.238$ ). Interestingly, formal education had  
214 significant negative effect on herpetofauna recognised ( $p = 0.011$ ).

215

### 216 **Awareness within the farming communities**

217 A majority of farmers were aware of the herpetofauna service provisioning in the agricultural system as 78 % of  
218 respondents across all levels of agricultural intensification agreed that herpetofauna is useful to their agriculture  
219 (Fig. 6). Further, in support of their opinions, they reported lizards, frogs, and skinks feeding on the pests and thus  
220 helping them to reduce the amount of pesticide. Small snakes, especially water snake (Checkered keelback) was  
221 mentioned to feed on the insect pests. Snakes were also reported to regulate rats, a major pest of paddy. 19  
222 validation group supported the statement that herpetofauna feed on insect pests and nine groups were in favor of  
223 the role of snakes in controlling rats. Contradictory to this, two farmers also mentioned the negative effects of  
224 snakes in agricultural fields for digging burrows in the levees causing water drainage from agricultural lands and  
225 impairing cultivation.

226

### 227 **Community reaction towards herpetofauna**

228 As we reviewed the kinds of reactions prevalent within the farming community about herpetofauna, the most  
229 dominant attitude was that of fear from snakes followed by religious faith. Killing is also prevalent although  
230 most agreed to kill snakes that are harmful to them. However, a notable percentage of farmers seemed to be  
231 involved in indiscriminate killing as well (Fig. 7).

232

### 233 **Discussion**

234 Local indigenous knowledge has been identified to be a valuable source of information. Accuracy of local species  
235 knowledge is reported to be more by farmers than academic zoologists (Ulicsni et al. 2018) which occur through  
236 years of observing the environment. According to our knowledge this is the first report on assessing herpetofaunal  
237 status in an agricultural landscape from eastern India based on local ecological community knowledge. Farmers  
238 showed a distinct difference in knowledge, opinions, and perceptions of herpetofauna between the low and the  
239 higher agricultural intensification zones. Respondents in high and medium cropping intensity areas recognizing  
240 the lesser number of herpetofauna compared to the respondents in low cropping intensity agricultural areas could



241 be either due to actual loss of diversity in the higher intensification zones or could be for some bias associated  
242 with farming exposure or due to differences in their level of education. However, no dependency on farming  
243 exposure prompt towards the diversity reported being indeed low in high cropping intensity areas compared to  
244 the areas at lower levels of intensification. Negative effect of formal education on recognizing a herpetofauna  
245 further shows the familiarity with local herpetofauna was based on practical knowledge and encounters that they  
246 have gained over years of coexistence with the taxa. Local knowledge suffers from lack of validation (Nadasdy  
247 2005) and hence not accepted by academic scientists who are not familiar with the traditional knowledge (Gilchrist  
248 and Mallory 2007). High inter reliability in our data therefore makes the results more reliable and acceptable  
249 scientifically. Hence the difference in knowledge reported in our study is actually a true representation of the  
250 diversity status rather than occurring by chance. Familiarity with local species reflects the awareness and  
251 involvement with their immediate environment and are of high value as these communities are the custodians and  
252 play significant role in conserving and restoring the local biodiversity (Ribot 2004). Ethnozoology has wider  
253 application in science from monitoring to population biology, conservation biology and biodiversity assessment  
254 (Diamond and Bishop 1999; Colding and Folke 2001). Such information could therefore serve as baseline for  
255 conserving herpetofauna.

256 A few ecological studies have highlighted the effect of agricultural intensification on the diversity of herpetofauna  
257 especially amphibians (Joly et al. 2001; Beja and Alcazar 2003). Similarly, Bohm et al. (2013) has also identified  
258 agriculture as a threat to 74% of the reptilian species. These are supportive of our findings where more farmers  
259 from higher intensification areas reported a significant decrease in amphibians and reptiles in their farmlands  
260 compared to farmers in low intensification areas.

261  
262 Pesticide has long been implicated as the most serious threat for the herpetofauna (Campbell and Campbell 2002;  
263 Hamer et al. 2004; Mann et al. 2009). Farmers seem to have the same opinion. This observation was affirmed  
264 more by farmers at high and mid intensification zones compared to the low zone is understandable. The intensive  
265 agriculture is overwhelmingly pesticide dependent and its impact on herpetofauna is definitely stronger in the  
266 high and the mid-level of intensification. Farmers also reported dead snakes and frogs near the agricultural field  
267 following pesticide application. Respondents felt that pesticide was not only a concern for herpetofauna but also  
268 fishes, crabs, earthworms, or any other useful fauna in agricultural landscapes.

269 One of the major challenges facing the conservation of herpetofauna in the agricultural landscape that our  
270 interaction with the farmers brought up was fear and antipathy. Some farmers expressed strong opposition to any

271 proposal for saving snakes. Such fears are often (Ceriaco 2012) and could be due to aversion (Bjerke, Kaltenborn  
272 and Thrane 2001), sometimes stemmed from cultural issues or even emotional reactions (Knight 2008). This is  
273 very similar to the perceptions that Whittekar and Shine (2000) described in their questionnaire survey based on  
274 venomous snakes and human conflict in an agroecosystem. They accounted one-third of half of the times a snake  
275 when approached was killed due to their defensive strategies being misinterpreted for attacking behavior. Two  
276 contrasting reactions were documented within the farming communities – one was to spare venomous snakes  
277 revering to some religious belief while the other was to kill them due to threat to farmers working in fields. The  
278 former is a result of fear and myths and has positive implications in the conservation of particular species (Khan  
279 Menon and Bawa 1997; Berkes 1999; Devereux 2000; Swamy Kumar and Sundarapandian 2003). A noticeable  
280 percentage of farmers also concluded of killing snakes irrespective of whether they are harmless or venomous,  
281 and this was out of sheer fear (Somaweera et al. 2010; Ceriaco 2012) and often lack of knowledge (Ceriaco 2012).  
282 Nevertheless, despite overall antipathy about these animals, farmers in our study regions were aware of the  
283 benefits of herpetofauna in an agricultural system. In our study some farmers even put forth the idea of maintaining  
284 herpetofauna in agricultural land for efficient biological pest control. This has been shown in ecological studies  
285 by Teng et al. (2016), Fang et al. (2019) and Khatiwada et al. (2016). Surprisingly farmers mentioning Checkered  
286 keelback capable of pest regulation also has been proved in a study by Hossain (2016) where the study showed  
287 their diet consisting majorly of arthropods. Though there were mixed opinions and reactions, yet the fact that the  
288 majority of farmers were aware of the ecosystem service rendered by herpetofauna is a good starting point to raise  
289 a concern about these taxa.

290 This study evidently shows the importance of local knowledge in interpreting the deteriorating effect of  
291 agricultural intensification on farmland herpetofauna. Such local knowledge is a perfect mixture of scientific and  
292 practical evidence (Olsson and Folke 2001) and can provide baseline information and bridge the gap between  
293 conservation science and local knowledge and improve the efficiency of scientific conservation designs for  
294 concerned taxa. This study is believed to pave the path for better cooperation between academic science, and  
295 indigenous community knowledge.

296

#### 297 **Acknowledgment:**

298 We thank the farming community of Balasore district, Odisha, for their participation and our field assistant for  
299 the support. We thank the Department of Zoology, the University of Calcutta for providing all the necessary

300 requirements for the work. This work has been a part of research funded by Rufford Small Grant (Application  
301 Id. 18506-1)

302

### 303 **Conflict of Interest**

304 The authors declare that they have no conflict of interest.

### 305 **Authors' contribution**

306 Both the authors contributed to the study conception and design. Material preparation, data collection and  
307 analysis were performed by Deyatima Ghosh. The first draft of the manuscript was written by Deyatima Ghosh  
308 and both authors commented on previous versions of the manuscript. Both the authors read and approved the  
309 final manuscript. Concept- PB & DG, Data collection-DG, Analysis- DG & PB, Write-up- PB & DG

### 310 **Literature Cited**

311 Araújo, B. Miguel, Thuiller Wilfried and Pearson G Richard., 2006. Climate warming and the decline of  
312 amphibians and reptiles in Europe. *Journal of Biogeography* 33, 1712–1728.

313 Balasore Official Website - Available at <https://baleswar.nic.in/>. Accessed: 5 December 2018. Archived by  
314 WebCite® at <http://www.webcitation.org/74QqYJe3y>.

315 Beebee, Trevor.J.C., Griffiths, Richard.A., 2005. The amphibian decline crisis: a watershed for conservation  
316 biology?. *Biological Conservation* 125, 271–285.

317 Beja, Pedro., Alcaza, Rita., 2003. Conservation of Mediterranean temporary ponds under agricultural  
318 intensification: an evaluation using amphibians. *Biol. Conserve.* 114(3), 317-326.

319 [https://doi.org/10.1016/S0006-3207\(03\)00051-X](https://doi.org/10.1016/S0006-3207(03)00051-X)

320 Bohm, Monika et al. 2013. The conservation status of the world's reptiles. *Biological Conservation* 157, 372–  
321 385.

322 Bjerke, T., Kaltenborn, B., Thrane, C., 2001. Sociodemographic correlates of fear-related attitudes toward the  
323 wolf (*Canis lupus lupus*). A survey in southeastern Norway. *Fauna Norv.* 21, 25-33.

324 Braga, Heitor .O., Schiavetti, Alexandre., 2013. Attitudes and local ecological knowledge of experts fishermen  
325 in relation to conservation and by catch of sea turtles (Reptilia: Testudines), Southern Bahia, Brazil. *Journal*  
326 *of Ethnobiology and Ethnomedicine* 9, 15.

327 Brook, Ryan.K., McLachlan, Stephane.M., 2008. Trends and prospects for local knowledge in ecological and  
328 conservation research and monitoring. *Biodiversity and Conservation* 17, 3501–3512.

- 329 Berkes, Fikret., Colding Johan and Folke, Carl. 2000. Rediscovery of traditional ecological knowledge as  
330 adaptive management. *Ecol. Appl.* 10, 1251-1262.
- 331 Berkes, Fikret. 1999. Sacred ecology; traditional ecological knowledge and resource management. Taylor and  
332 Francis, Philadelphia, Pennsylvania, USA.
- 333 Campbell, R. Kym and Campbell, S. Todd. 2002. A logical starting point for developing priorities for lizard and  
334 Snake ecotoxicology: a review of available data. *Environ. Toxicol. Chem.* 21, 894–898.
- 335 Ceriaco, Luis.M.P., 2012. Human attitudes towards herpetofauna: The influence of folklore and negative values  
336 on the conservation of amphibians and reptiles in Portugal. *Journal of Ethnobiology and Ethnomedicine* 8, 8.
- 337 Cesard, N., Heri, V., 2014. Indigenous and local knowledge about pollination and pollinators associated with  
338 food protection. In: Lyver, P., Carneiro da Cunha, M. and Roue, M., Editors, 2014. United Nations  
339 Educational, Scientific and Cultural Organization, France.
- 340 Chakrabarti, Priyadarshini., Rana, Santanu., Sarkar, Sagartirtha., Smith Barbara and Basu, Parthiba. 2015.  
341 Pesticide-induced oxidative stress in laboratory and field population of native honey bees along intensive  
342 agricultural landscapes in two eastern Indian states. *Apidologie* 46, 107–129.
- 343 Colding, J., Folke, C. 2001. Social taboos: “invisible” systems of local resource management and biological  
344 conservation. *Ecological Applications* 11, 584–600.
- 345 Chowdhury, S.H Mohammad and Koike, Masao., 2010. An overview on the protected area system for forest  
346 conservation in Bangladesh. *Journal of Forest Research* 21, 111–118.
- 347 Collins, James.P., Storfer, Andrew., 2003. Global amphibian declines: sorting the hypotheses. *Diversity and*  
348 *Distributions* 9, 89-98.
- 349 Daniel, Ranjit.J.R., 2002. Amphibians of Peninsular India. Hyderguda, Hyderabad, India: Universities Press.
- 350 Daniels, J.C., 2005. The Book of Indian Reptiles and Amphibians. Bombay,India: BNHS Oxford University  
351 Press.
- 352 Devereux, Paul., 2000. The Sacred Place: The Ancient Origins of Holy and Mystical Sites; Cassell: London,  
353 UK.
- 354 Dicks, V. Lynn et al. 2016. Ten policies for pollinators. *Science* 354, 975–976.
- 355 Diamond, J., Bishop, K. D., 1999. Ethno-ornithology of the Ketengban people, Indonesian New Guinea. In  
356 Folkbiology, ed. D.L. Medin and A. Scott, 17–45. Cambridge: MIT Press.

- 357 Fang, Kaikai., Yi, Xiaomei., Dai, Wei., Gao Hui., and Cao Linkui. 2019. Effects of Integrated Rice-Frog  
358 Farming on Paddy Field Greenhouse Gas Emissions. *The International Journal of Environmental Research  
359 and Public Health* 16, 1930.
- 360 Fabricius, Christo., Burger, Marius., and Hockey P.A.R. 2003. Comparing biodiversity between protected area  
361 and adjacent rangeland in xeric succulent thicket, South Africa: arthropods and reptiles. *Journal of Applied  
362 Ecology* 40, 392–403.
- 363 Gibbons, J. Whitfield. 2000. The Global Decline of Reptiles, Déjà vu Amphibians. *BioScience* 50, 8.
- 364 Folke, C., Colding, J., Berkes, F., 2003. Synthesis: building resilience and adaptive capacity in social-  
365 ecological systems. In: F. Berkes, J. Colding, and C. Folke, editors. *Navigating social-ecological systems:  
366 building resilience for complexity and change*. Cambridge University, pp. 352-387.
- 367 Gilchrist, Grant and Mallory, Mark. 2007. Comparing expert-based science with local ecological knowledge:  
368 What are we afraid of? *Ecology and Society* 12,1.
- 369 Gryzwacz, D., Stevenson, P. C., Mushobozi, W. L., Belmain, S., Wilson, K., 2014. The use of indigenous  
370 resources for pest control in Africa. *Food Secur.* 6, 71-86.
- 371 Gibbons, J. Whitfield. 2000. The Global Decline of Reptiles, Déjà vu Amphibians. *BioScience* 50, 8.
- 372 Hossain, **Md Lokman**. 2016. Food habits of checkered keelback, *Xenochrophis piscator* (Schneider, 1799), in  
373 Bangladesh. *Bangladesh Journal of Zoology* 44(1), 153-161.
- 374 Hamer, Andrew.J., Makings, Julie.A., Lane, Simon.J., Mahony, Michael.J., 2004. Amphibian decline and  
375 fertilizers used on agricultural land in south-eastern Australia. *Agriculture Ecosystems and Environment* 102,  
376 299–305.
- 377 Hunter, Lori.M., Brehm, Joan., 2003. Qualitative Insight into Public Knowledge of, and Concern With,  
378 Biodiversity. *Hum. Ecol.* 31.
- 379 Joly, Pierre., Miaud, Claude., Lehmann, Anthony., Grolet, Odile., 2001. Habitat Matrix Effects on Pond  
380 Occupancy in Newts. *Conservation Biology* 15(1), 239-248.
- 381 Khatiwada, R. Janak, et al. 2016. Frogs as potential biological control agents in the rice fields of Chitwan,  
382 Nepal. *Agriculture Ecosystems and Environment* 230, 307–314.
- 383 Kittusamy, Ganesan, Kandaswamy, Chandrasekar, Kandan Nambirajan and Subramanian Muralidharan 2014.  
384 Pesticide Residues in Two Frog Species in a Paddy Agroecosystem in Palakkad District, Kerala, India.  
385 *Bulletin of Environmental Contamination and Toxicology* 93, 728–734.

- 386 Khan, M.Latif., Menon, Shaily., Bawa, Kamaljit.S., 1997. Effectiveness of the protected area network in  
387 biodiversity conservation: a case-study of Meghalaya state. *Biodiversity and Conservation*. 6, 853-868.
- 388 Knight, J. Andrew., 2008. "Bats, snakes and spiders, Oh my!" How aesthetic and negativistic attitudes, and  
389 other concepts predict support for species protection. *The Journal of Environmental Psychology* 28, 94-103.  
390 10.1016/j.jenvp.2007.10.001.
- 391 Mann, M. Reinier, Hyne, V. Ross, .V., Choung, B. Catherine, Wilson P. Scott 2009. Amphibians and  
392 agricultural chemicals: Review of the risks in a complex environment. *Environmental Pollution* 157, 2903–  
393 2927.
- 394 McHugh, Mary.L. 2012. Interrater reliability: the kappa statistic. *Biochem. Med. (Zagreb)*. 22(3), 276-282.
- 395 Olsson, Per, and Folke, Carl. 2001. Local Ecological Knowledge and Institutional Dynamics for Ecosystem  
396 Management: A Study of Lake Racken Watershed, Sweden. *Ecosystems* 4, 85–104 (2001).  
397 <https://doi.org/10.1007/s100210000061>
- 398 Nadasdy, Paul. (2005) *Hunters and bureaucrats: Power, knowledge, and aboriginal-state relations in the*  
399 *southwest Yukon*. Victoria: UBC Press.
- 400 Ribot, Jesse. C., 2004. *Waiting for democracy. The politics of choice in natural resources decentralization*. WRI  
401 Report Washington DC. World Resources Institute.
- 402 Roue, M., Césard, N., Yao, Y.C.A., Oteng-Yeboah, A., 2017. *Knowing our lands and resources Indigenous and*  
403 *local knowledge of biodiversity and ecosystem services in Africa*. United Nations Educational, Scientific and  
404 Cultural Organization, Paris, France. Marie m RoueMarie m RoueNicolas CésardNicolas CésardYao  
405 AdouYao AdouAlfred Oteng-Yeboah
- 406 Sanyal, D.P., 1993. *Reptilia. In: State fauna series I: Fauna of Orissa, Part 4*. The director, Zoological Survey  
407 of India, Kolkata, West Bengal, India. pp. 51–74.
- 408 Sarkar, A.K. 1993. *Amphibia. In State fauna series I: Fauna of Orissa, Part 4*. The director, Zoological Survey  
409 of India, West Bengal, Kolkata, pp. 39–49.
- 410 Somaweera, Ruchira, Somaweera Nilusha and Shine, Richard. 2010. Frogs under friendly fire: How accurately  
411 can the general public recognize invasive species? *Biological Conservation* 143 (6), 1477–1484.
- 412 Scoccianti, Carlo. 2004. Amphibians: threats and conservation. *Italian Journal of Zoology* 71, 9–15.
- 413 Segger, C.C. Marie, and Phillips Freedom-kai. 2015. Indigenous traditional knowledge for sustainable  
414 development: the biodiversity convention and plant treaty regimes. *Journal of Forest Research* 20(5), 430–  
415 437.

- 416 Singh, K. Ranjay, and Sureja K. Amish. 2006. Community knowledge and sustainable natural resources  
417 management: learning from the Monpa of Arunachal Pradesh. *The Journal for Transdisciplinary Research in*  
418 *Southern Africa* 2, 72–100.
- 419 Singh, K. Ranjay, Rallen, Orlik, and Padung Egul, 2013. Elderly Adi Women of Arunachal Pradesh: ‘‘Living  
420 Encyclopedias’’ and Cultural Refugia in Biodiversity Conservation of the Eastern Himalaya, India.  
421 *Environmental Management* 52, 712–735.
- 422 Smith, A. Malcolm, 2003. Handbook of Indian Snakes, New Delhi, India: Cosmo Publications.
- 423 Smith, M. Barbara et al. 2017. Collating and validating indigenous and local knowledge to apply multiple  
424 knowledge systems to an environmental challenge: A case-study of pollinators in India.  
425 *Biological Conservation* 211, 20–28.
- 426 Sparling, W. Donald et al. 2015. Insitu effects of pesticides on amphibians in the Sierra Nevada. *Ecotoxicology*  
427 24, pp. 262–278.
- 428 Stuart, N. Simon et al. 2004. Status and trends of amphibian decline and extinctions worldwide. *Science* 306,  
429 1783–1786.
- 430 Sutherland, J. William, Pullin, S. Andrew, Dolman, M. Paul, and Knight Teri. 2004. The need for evidence-  
431 based conservation. *Trends in Ecology & Evolution* 19, 305-308.
- 432 Sutherland, J. William. 2013. Review by quality not quantity for better policy. *Nature* 503, 167.
- 433 Swamy, P.S., Kumar, M., Sundarapandian, S.M., 2003. Spirituality and sacred groves in Tamil Nadu,  
434 India. *Unasyva*. 54, 53–7.
- 435 Teng, Qing et al. 2016. Influences of introducing frogs in the paddy fields on soil properties and rice growth.  
436 *Journal of Soils Sediments* 16, 51–61.
- 437 Ulicsni, Viktor et al. 2018. Bridging conservation science and traditional knowledge of wild animals: The need  
438 for expert guidance and inclusion of local knowledge holders. *Ambio* 48. 10.1007/s13280-018-1106-z.
- 439 Uyeda, T. Linda et al. 2014. The role of traditional beliefs in conservation of herpetofauna in Banten, Indonesia.  
440 *Oryx* 50, 296–301.
- 441 Valentine, E. Leonie, Roberts, Brady, and Schwarzkopf, Lin. 2007. Mechanisms driving avoidance of non-  
442 native plants by lizards. *Journal of Applied Ecology* 44, 228-237.
- 443 Whittekar, Patrik B, and Shine Richard. 2000. Sources of Mortality of Large Elapid Snakes in an Agricultural  
444 Landscape. *Journal of Herpetology* 34(1), 121–128.

445 Whitfield, S.M., Bell, K. E., Philippi, T., Sasa, M., Bolanos, F., Chaves, G., Savage, J.M., Donnelly, M.A.,  
446 2007. Amphibian and reptile declines over 35 years at La Selva, Costa Rica. Proc. Natl. Acad. Sci. U. S. A.  
447 104, 8352– 8356.

448 Whitaker, R., Captain, A., 2016. Snakes of India - The Field Guide. Chennai, Tamil Nadu, India: Westland  
449 Books Pvt Ltd.

450

451

452

453

454

455

456

457

458

459

460

461

462

463

464

465



466

467

468 **Table 1. Characteristics of Low, mid and high agricultural intensification gradient**

| Low                                                                | Mid                                                    | High                                                  |
|--------------------------------------------------------------------|--------------------------------------------------------|-------------------------------------------------------|
| Rain fed agriculture with little or no pesticide input             | Heavy pesticide use both frequency of spray and volume | High pesticide use both frequency of spray and volume |
| Low cropping intensity                                             | Medium agricultural intensity                          | High cropping intensity                               |
| Close to forest area with high natural and semi natural vegetation | Moderate natural and semi natural vegetation           | Little natural and semi-natural vegetation            |

469

470

471

472

473

474

475

476

477

478

479

480

481

482

483

484

485

486

487

488

489 **Table 2. Questions asked to the farmers**

| Questions asked in the survey                                                          |
|----------------------------------------------------------------------------------------|
| 1. How many years you are in farming?                                                  |
| 2. Do you see snakes/frogs/lizards/skinks?                                             |
| 3. Which time of the year do you see them the most?                                    |
| 4. Where do you see them in your field?                                                |
| 5. Which species do you see mostly during sowing and harvesting?                       |
| 6. What do you do when you see them?                                                   |
| 7. Can you identify them by looking at these pictures?                                 |
| 8. Is there any change in the number of herpetofauna over the years as observed by you |
| 9. What do you think to be the reason for their decline?                               |
| 10. Do you feel pesticide can be a reason for their decline                            |
| 11. How might pesticides affect them?                                                  |
| 12. Have you seen any evidence of pesticides affecting these animals?                  |
| 13. Do you think they are useful in agricultural lands?                                |
| 14. How do you think they might be helping in agriculture                              |
| 15. How do you think they help in pest regulation?                                     |
| 16. What do you feel about these animals when you see them?                            |

490

491

492

493

494

495

496

497

498

499

500

501

502 **Table 3. Example of few statements made from the individual questionnaire survey for the validation**

503 **process**

| Questions                                                                       | Statements I                                                                                             | Statements II                                                                                 |
|---------------------------------------------------------------------------------|----------------------------------------------------------------------------------------------------------|-----------------------------------------------------------------------------------------------|
| In your opinion is there any change in the abundance of herpetofauna over years | There is a decrease in the number of herpetofauna seen in fields as compared to what was observed before | Number has increased or is the same                                                           |
| Why do you think there has been a decrease in herpetofauna over years           | Pesticide is a major reason for the decrease in herpetofauna                                             | Deforestation, Loss of habitat and environmental pollutions are the reasons for their decline |
| Are herpetofauna Important in your field                                        | Yes                                                                                                      | No                                                                                            |

504

505

506

507

508

509

510

511

512

513

514

515

516

517

518

519

520

521

522 **Table 4. List of herpetofauna used for the survey program**

|    | Common Names                  | Scientific Name                                                 | Family      |
|----|-------------------------------|-----------------------------------------------------------------|-------------|
| 1  | Worm Snake                    | <i>Indotyphlops braminus</i> (Daudin, 1803)                     | Typhlopidae |
| 2  | Common Sand Boa               | <i>Gongylophis conicus</i> (Schneider, 1801)                    | Boidae      |
| 3  | Red Sand Boa                  | <i>Eryx johnii</i> (Russell, 1801)                              |             |
| 4  | Indian Python                 | <i>Python molurus</i> (Linnaeus, 1758)                          |             |
| 5  | Copper-Headed Trinket Snake   | <i>Coelognathus radiatus</i> (Boie, 1827)                       | Colubridae  |
| 6  | Common Trinket Snake          | <i>Coelognathus helenus</i> (Daudin, 1803)                      |             |
| 7  | Oriental Rat Snake            | <i>Ptyas mucosa</i> (Linnaeus, 1758)                            |             |
| 8  | Banded Racer                  | <i>Argyrogena fasciolata</i> (Shaw, 1802)                       |             |
| 9  | Russell's Kukri Snake         | <i>Oligodon taeniolatus</i> (Jerdon, 1853)                      |             |
| 10 | Common Kukri Snake            | <i>Oligodon arnensis</i> (Shaw, 1802)                           |             |
| 11 | Chequered Water Snake         | <i>Fowlea piscator</i> (Schneider, 1799)                        |             |
| 12 | Striped Keel Back             | <i>Amphiesma stolatum</i> (Linnaeus, 1758)                      |             |
| 13 | Vine Snake                    | <i>Ahaetulla nasuta</i> (Lacépède, 1789)                        |             |
| 14 | Brown vine snake              | <i>Ahaetulla pulverulenta</i> (Duméril, Bibron & Duméril, 1854) |             |
| 15 | Common Wolf snake             | <i>Lycodon aulicus</i> (Linnaeus, 1758)                         |             |
| 16 | Common Bronze Back Tree Snake | <i>Dendrelaphis tristis</i> (Daudin, 1803)                      |             |
| 17 | Ornate Flying Snake           | <i>Chrysopelea ornata</i> (Shaw, 1802)                          |             |
| 18 | Common Cat Snake              | <i>Boiga trigonata</i> (Schneider, 1802)                        |             |
| 19 | Forsten's Cat Snake           | <i>Boiga forsteni</i> (Duméril, Bibron & Duméril, 1854)         |             |
| 20 | Green Keel Back               | <i>Rhabdophis plumbicolor</i> (Cantor, 1839)                    |             |
| 21 | Monocled Cobra                | <i>Naja kaouthia</i> (Lesson, 1831)                             | Elapidae    |

|    |                            |                                                     |                |
|----|----------------------------|-----------------------------------------------------|----------------|
| 22 | Spectacled Cobra           | <i>Naja naja</i> (Linnaeus, 1758)                   |                |
| 23 | King Cobra                 | <i>Ophiophagus hannah</i> (Cantor, 1836)            |                |
| 24 | Common Krait               | <i>Bungarus caeruleus</i> (Schneider, 1801)         |                |
| 25 | Banded Krait               | <i>Bungarus fasciatus</i> (Schneider, 1801)         |                |
| 26 | Bamboo Pit Viper           | <i>Trimeresurus gramineus</i> (Shaw, 1802)          | Viperidae      |
| 27 | Russell's Viper            | <i>Daboia russelii</i> (Shaw & Nodder, 1797)        |                |
| 28 | Saw Scaled Viper           | <i>Echis carinatus</i> (Schneider, 1801)            |                |
| 29 | Bronze Grass Skink         | <i>Eutropis macularia</i> (Blyth, 1853)             | Skincidae      |
| 30 | White-Spotted Supple Skink | <i>Lygosoma albopunctatum</i> (Gray, 1846)          |                |
| 31 | Common snake skink         | <i>Lygosoma punctate</i> (Gmelin, 1799)             |                |
| 32 | Oriental Garden Lizard     | <i>Calotes versicolor</i> (Daudin, 1802)            | Agamidae       |
| 33 | South Indian Rock Agama    | <i>Psammophilus dorsalis</i> (Gray, 1831)           |                |
| 34 | Chameleon                  | <i>Chamaeleo zeylanicus</i> (Laurenti, 1768)        | Chamaeleonidae |
| 35 | Water Monitor Lizard       | <i>Varanus salvator</i> (Laurenti, 1768)            | Varanidae      |
| 36 | Common Indian Monitor      | <i>Varanus bengalensis</i> (Daudin, 1802)           |                |
| 37 | Turtle                     | <i>Melanochelys trijuga</i> (Schweigger, 1812)      | Testudines     |
| 38 | Common Indian Toad         | <i>Duttaphrynus melanostictus</i> (Schneider, 1799) | Bufonidae      |
| 39 | Common Tree Frog           | <i>Polypedates leucomystax</i> (Gravenhorst, 1829)  | Rhacophoridae  |
| 40 | Indian Bull Frog           | <i>Hoplobatrachus tigerinus</i> (Daudin, 1803)      | Dicroglossidae |
| 41 | Indian Bull Frog (Morph)   | <i>Hoplobatrachus tigerinus</i> (Daudin, 1803)      |                |
| 42 | Indian Skipping Frog       | <i>Euphlyctis cyanophlyctis</i> (Schneider, 1799)   |                |
| 43 | Fejervarya sp. 1           | <i>Fejervarya</i> sp.                               |                |
| 44 | Fejervarya sp. 2           | <i>Fejervarya</i> sp.                               |                |
| 45 | Theobald's Reed Frog       | <i>Hylarana tyleri</i> (Theobald, 1868)             | Ranidae        |
| 46 | Balloon Frog               | <i>Uperodon globulosus</i> (Gunther, 1864)          | Microhylidae   |

523

524

525

526

527

528  
529  
530  
531  
532  
538  
539  
540  
541  
542  
543  
544  
545  
546  
547  
548  
549  
550  
551  
552  
553  
554  
555  
556  
557

**Table 5. Marascuilo test statistics for all herpetofaunal groups**

| Difference | Proportion Difference | Critical values | Significance |
|------------|-----------------------|-----------------|--------------|
| Low –Mid   | 0.2                   | 0.1             | Yes          |
| Mid- High  | 0.1                   | 0.2             | No           |
| Low-High   | 0.3                   | 0.1             | Yes          |

533  
534  
535  
536  
537

558

559

560

561 **Table 6. Marascuilo Test Statistics for Amphibians**

| Difference | Proportion Difference | Critical values | Significance |
|------------|-----------------------|-----------------|--------------|
| Low –Mid   | 0.3                   | 0.3             | Yes          |
| Mid- High  | 0.1                   | 0.3             | No           |
| Low-High   | 0.4                   | 0.3             | Yes          |

562

563

564

565

566

567

568

569

570

571

572

573

574

575

576

577

578

579

580

581

582

583

584

585

586

587 **Table 7. Marascuilo Test Statistics for Snakes**

| Difference | Proportion Difference | Critical values | Significance |
|------------|-----------------------|-----------------|--------------|
| Low –Mid   | 0.3                   | 0.3             | Yes          |
| Mid- High  | 0.1                   | 0.3             | No           |
| Low-High   | 0.4                   | 0.3             | Yes          |

588

589

590

591

592

593

594

595

596

597

598

599

600

601

602

603

604

605

606

607

608

609



610

| Intensification gradient | Village names    | Value of kappa for 5 individual survey | Level of agreement | % of data that is reliable |
|--------------------------|------------------|----------------------------------------|--------------------|----------------------------|
| Low                      | Balichua         | 0.82                                   | Strong             | 64-81%                     |
| Low                      | Khunkut          | 0.8857                                 | Strong             | 64-81%                     |
| Low                      | Todo ashoknal    | 0.84                                   | Strong             | 64-81%                     |
| Low                      | Balianal         | 0.9306                                 | Almost perfect     | 82-100%                    |
| Low                      | Tortori          | 1                                      | Almost perfect     | 82-100%                    |
| Low                      | Betokata         | 0.9346                                 | Almost perfect     | 82-100%                    |
| Low                      | Gopal            | 0.9836                                 | Almost perfect     | 82-100%                    |
| Low                      | Keramara         | 0.902                                  | Almost perfect     | 82-100%                    |
| Low                      | Ashoknal         | 0.9714                                 | Almost perfect     | 82-100%                    |
| Mid                      | Sutanuti         | 0.8693                                 | Strong             | 64-81%                     |
| Mid                      | Dumuria          | 0.9795                                 | Almost perfect     | 82-100%                    |
| Mid                      | Dashipur         | 0.9918                                 | Almost perfect     | 82-100%                    |
| Mid                      | Udaypur          | 0.9836                                 | Almost perfect     | 82-100%                    |
| Mid                      | Kudia            | 0.9836                                 | Almost perfect     | 82-100%                    |
| High                     | Chalonti         | 0.8938                                 | Strong             | 64-81%                     |
| High                     | Ektali           | 0.9918                                 | Almost perfect     | 82-100%                    |
| High                     | Malgodia         | 0.9469                                 | Almost perfect     | 82-100%                    |
| High                     | Gobardhanpur     | 0.9673                                 | Almost perfect     | 82-100%                    |
| High                     | Rairamchandrapur | 0.9183                                 | Almost perfect     | 82-100%                    |
| High                     | Seksarai         | 0.8408                                 | Strong             | 64-81%                     |

611

612 **Table 8. List of values for inter- reliability test for recognizing herpetofauna for each village**

613

614

615

616

617

618

619

620

621 **Figure 1** Map showing three towns along the intensification gradient where interviews were conducted

622 **Figure 2** Schematic representation of performing inter-reliability with data on recognized herpetofauna in each  
623 village

624 **Figure 3** Proportion of farmers voting for a decrease of herpetofauna across gradient

625 **Figure 4** Percentage of farmers voting for deforestation, pesticide, climate/environmental pollution, conflict and  
626 pesticide as reasons for herpetofaunal decrease

627 **Figure 5** Percentage of farmers accepting pesticide as a cause for herpetofauna decrease

628 **Figure 6** Farmers' awareness about herpetofauna as a pest regulator

629 **Figure 7** Reaction of farmers towards herpetofauna

630

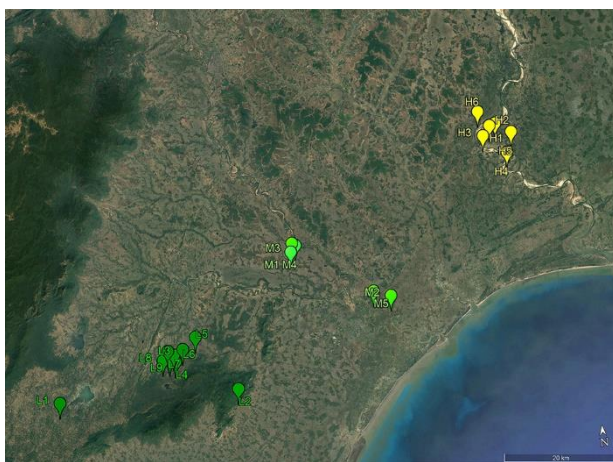

631

632 **Fig 1**

633

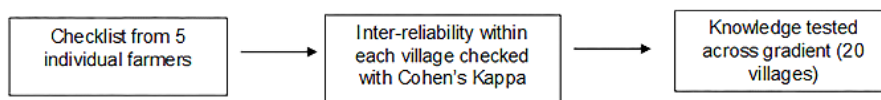

634

635

636 **Fig 2**

637

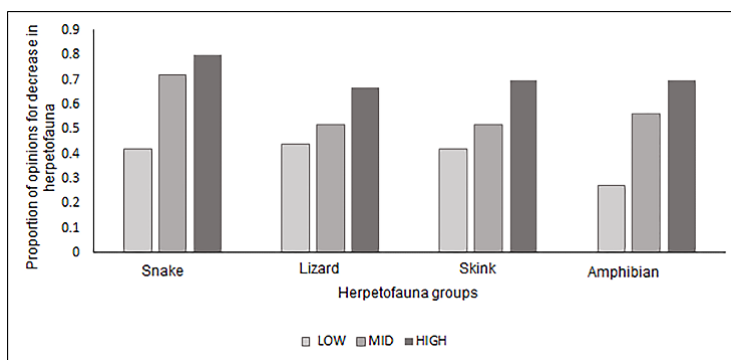

638

639 **Fig 3**

640

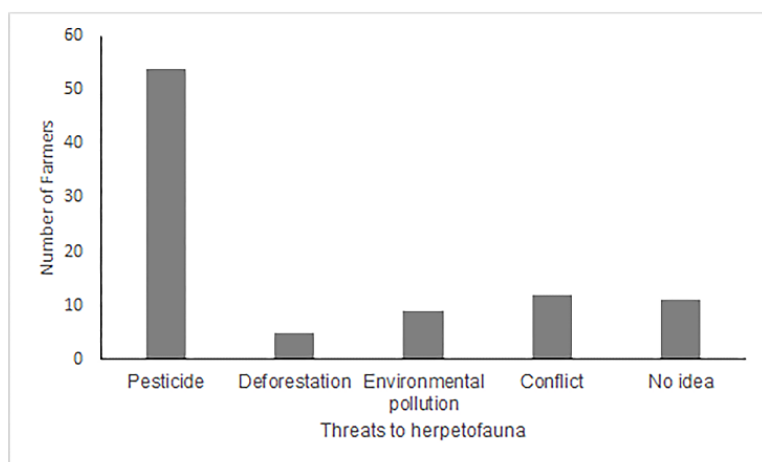

641

642 **Fig 4**

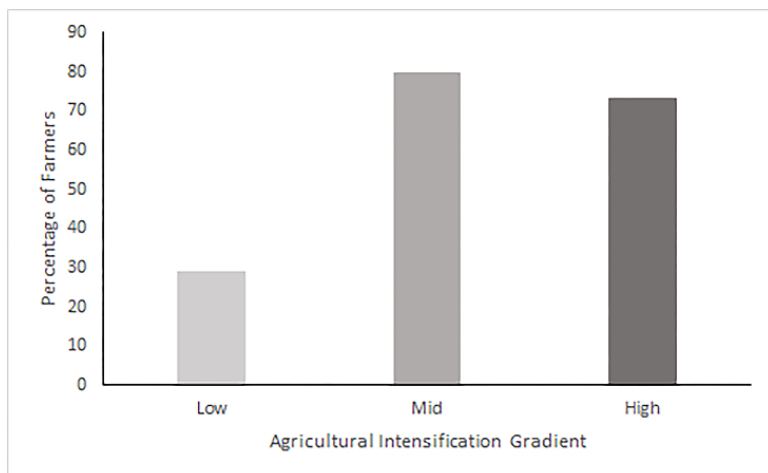

643

644 **Fig 5**

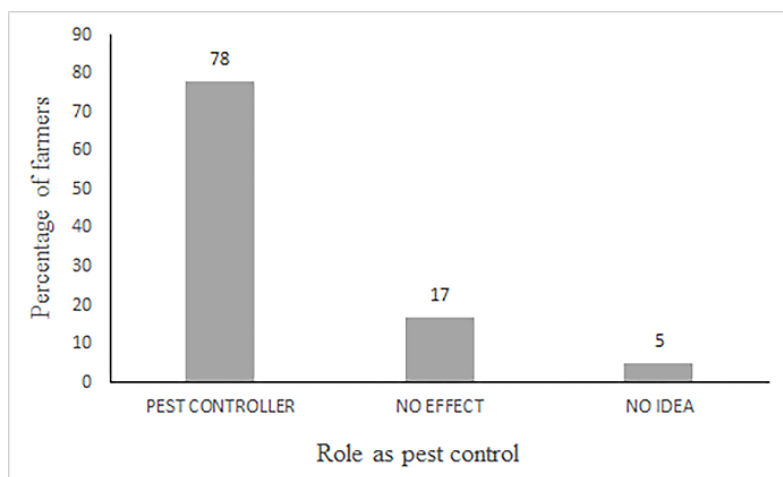

645

646 **Fig 6**

647

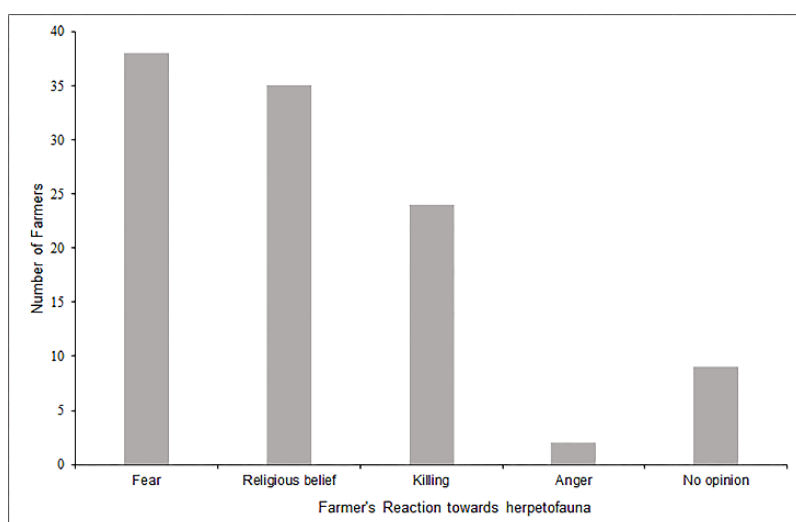

648

649 **Fig 7**

650

651

652

### 653 **Supporting Information**

654 **S1 Figure** Schematic representation of applying the inter-reliability test between herpetofauna recognition

655 checklist from each village and from the two validation groups

656 **S1 Table** Inter-reliability between data for herpetofauna recognition checklist from each village and the two

657 validation groups

658

659

660

661
